# Supplementary material for: Exploring Residents’ Healthcare Utilization under the Family Physician Contract Service System in China: Implications for Primary Healthcare
Source: Hindawi journal article supplement (doi:10.1155/2024/2745653), 2024-01-01
Supplement: f1 [file 2745653.f1.docx]

**Table S1.** The associations of family physician contract service with residents' healthcare utilization using different models

| Variables | Number of monthly primary care visits | | Number of annual hospital admissions | | Number of annual referrals | |
| --- | --- | --- | --- | --- | --- | --- |
| Model 1 a | Model 2 a | Model 1 b | Model 2 b | Model 1 c | Model 2 c |
| Contracted with a family physician (vs. did not contracted) | 1.95***(1.44, 2.63) | 1.78***(1.28, 2.47) | 0.81(0.60, 1.10) | 0.79(0.58, 1.07) | 2.46***(1.30, 4.64) | 1.93***(1.37, 2.72) |
| City (vs. Xiamen) |  |  |  |  |  |  |
| Hangzhou | 1.05(0.59, 1.89) | 1.13(0.67, 1.93) | 1.09(0.67, 1.79) | 1.03(0.64, 1.66) | 0.36**(0.13, 0.96) | 0.83(0.52, 1.33) |
| Shanghai | 1.78(0.89, 3.58) | 1.81**(1.04, 3.13) | 0.79(0.49, 1.29) | 0.77(0.47, 1.24) | 3.79***(1.60, 9.00) | 1.69**(1.10, 2.60) |
| Beijing | 0.42**(0.22, 0.82) | 0.43***(0.24, 0.77) | 0.48***(0.28, 0.80) | 0.48***(0.29, 0.80) | 4.24***(1.87, 9.59) | 0.44***(0.26, 0.74) |
| Age | 1.00(0.99, 1.02) | 1.01(0.99, 1.02) | 1.02***(1.01, 1.04) | 1.02***(1.01, 1.04) | 0.99(0.96, 1.02) | 0.99*(0.98, 1.00) |
| Male (vs. female) | 0.70**(0.52, 0.94) | 0.61***(0.43, 0.85) | 1.36*(1.00, 1.85) | 1.36**(1.00, 1.85) | 2.37***(1.42, 3.95) | 0.66**(0.48, 0.91) |
| Non-migrants (vs. migrants) | 0.97(0.53, 1.77) | 0.98(0.54, 1.80) | 1.04(0.67, 1.61) | 0.98(0.62, 1.57) | 3.16**(1.09, 9.19) | 0.88(0.53, 1.45) |
| Living in urban areas (vs. rural) | 1.46(0.81, 2.61) | 1.38(0.81, 2.37) | 0.87(0.56, 1.35) | 0.95(0.61, 1.48) | 0.86(0.33, 2.26) | 0.97(0.58, 1.62) |
| Married (vs. unmarried) | 0.71*(0.49, 1.02) | 0.60**(0.39, 0.93) | 1.11(0.74, 1.67) | 1.16(0.78, 1.72) | 0.72(0.37, 1.38) | 0.57***(0.40, 0.80) |
| Education (vs. primary school and below) |  |  |  |  |  |  |
| Middle school | 0.82(0.53, 1.27) | 0.93(0.58, 1.48) | 1.25(0.71, 2.20) | 1.22(0.71, 2.11) | 1.02(0.50, 2.06) | 0.76(0.51, 1.14) |
| High school | 0.93(0.58, 1.50) | 1.04(0.64, 1.70) | 1.18(0.64, 2.18) | 1.1(0.61, 1.99) | 0.76(0.33, 1.72) | 0.77(0.50, 1.18) |
| Two-/Three-Year College/Associate degree | 0.79(0.44, 1.40) | 0.96(0.53, 1.75) | 1.38(0.69, 2.76) | 1.3(0.65, 2.58) | 0.92(0.32, 2.59) | 0.65(0.36, 1.17) |
| Bachelor degree and above | 1.32(0.71, 2.45) | 1.15(0.59, 2.24) | 1.48(0.70, 3.26) | 1.44(0.66, 3.15) | 0.99(0.37, 2.64) | 0.84(0.45, 1.57) |
| Health insurance (vs.UEBMI) |  |  |  |  |  |  |
| URRBMI | 1.31(0.94, 1.84) | 1.23(0.85, 1.76) | 1.33(0.90, 2.00) | 1.33(0.90, 1.97) | 1.15(0.58, 2.31) | 0.93(0.67, 1.30) |
| Government medical insurance (gong-fei) | 0.73(0.37, 1.45) | 0.65(0.33, 1.26) | 1.57(0.89, 2.78) | 1.5(0.86, 2.61) | 3.24***(1.66, 6.34) | 0.71(0.35, 1.45) |
| Having commercial insurance (vs. not having) | 0.82(0.48, 1.38) | 0.85(0.53, 1.35) | 1.38*(0.95, 2.01) | 1.39*(0.96, 2.02) | 1.53(0.72, 3.25) | 0.87(0.59, 1.29) |
| Employment status (vs. Employed) |  |  |  |  |  |  |
| Retired | 1.3(0.72, 2.35) | 1.21(0.65, 2.24) | 1.04(0.63, 1.72) | 1.05(0.65, 1.72) | 0.94(0.32, 2.75) | 1.68*(0.95, 2.99) |
| Unemployed or at school | 1.65(0.79, 3.43) | 1.75(0.80, 3.84) | 1.66*(0.96, 2.88) | 1.63*(0.94, 2.83) | 2.97*(0.93, 9.54) | 1.83*(0.98, 3.42) |
| Individual monthly income, CNY (vs. <=3000) |  |  |  |  |  |  |
| 3000-5000 | 1.68**(1.06, 2.64) | 1.95***(1.23, 3.09) | 1.13(0.71, 1.80) | 1.11(0.72, 1.73) | 0.37***(0.19, 0.70) | 1.54**(1.02, 2.34) |
| 5000-8000 | 1.17(0.67, 2.02) | 1.66*(0.93, 2.95) | 1.24(0.70, 2.22) | 1.25(0.71, 2.18) | 0.52(0.23, 1.21) | 1.43(0.81, 2.52) |
| >8000 | 0.81(0.34, 1.90) | 1.3(0.52, 3.24) | 0.57(0.25, 1.33) | 0.57(0.24, 1.34) | 0.62(0.18, 2.16) | 0.95(0.41, 2.19) |
| Having chronic disease (vs. not having) | 0.94(0.60, 1.47) | 0.94(0.63, 1.42) | 1.41(0.93, 2.13) | 1.47*(1.00, 2.17) | 1.3(0.71, 2.38) | 0.99(0.69, 1.42) |
| Self-reported health status (vs. good or very good) |  |  |  |  |  |  |
| Fair | 1.60**(1.03, 2.47) | 1.96***(1.35, 2.85) | 1.23(0.82, 1.84) | 1.20(0.82, 1.77) | 1.84**(1.05, 3.21) | 1.61***(1.16, 2.24) |
| Poor or very poor | 4.08***(2.63, 6.32) | 5.14***(3.52, 7.52) | 3.13***(2.14, 4.57) | 3.09***(2.13, 4.48) | 2.53***(1.30, 4.91) | 3.60***(2.37, 5.47) |
| Constant term | 0.09***(0.03, 0.23) | 0.06***(0.02, 0.16) | 0.02***(0.01, 0.06) | 0.20***(0.01, 0.06) | 0.02***(0.001, 0.19) | 0.43*(-0.01, 0.86) |

*Note:* UEBMI, Urban Employee Basic Medical Insurance; URRBMI, Urban and Rural Resident Basic Medical Insurance; CNY, Chinese Yuan; IRR, incidence-rate ratio; 95% CI: 95% confidence interval.

Model 1 a: Poisson Regression; Model 2 a: Negative Binomial Regression;

Model 1 b: Poisson Regression; Model 2 b: Negative Binomial Regression;

Model 1 c: Poisson Regression; Model 2 c: Zero-inflated Negative Binomial Regression;

*** *p*-value < 0.01, ** *p*-value < 0.05, * *p*-value < 0.1.

**Table S2.** The associations of family physician contract service with residents' healthcare utilization using multilevel mixed-effects regression

| Variables | Number of monthly primary care visits a | Number of annual hospital admissions a | Number of annual referrals a | Probability of choosing primary health care institutions after illnesses b |
| --- | --- | --- | --- | --- |
| IRR (95% CI) | IRR (95% CI) | IRR (95% CI) | OR (95% CI) |
| **Fixed effects** |  |  |  |  |
| Contracted with a family physician (vs. did not contracted) | 1.78***(1.20, 2.60) | 0.80 (0.57, 1.11) | 2.09**(1.11, 3.93) | 2.73***(1.39, 5.34) |
| **Random effects** |  |  |  |  |
| City |  |  |  |  |
| Var (constant term) | 0.22 (0.04, 1.11) | 0.26 (0.01, 0.96) | 0.54 (0.08, 3.58) | 0.02 (0, 66.90) |

*Note:* UEBMI, Urban Employee Basic Medical Insurance; URRBMI, Urban and Rural Resident Basic Medical Insurance; CNY, Chinese Yuan; IRR, incidence-rate ratio; OR, odds ratio; 95% CI: 95% confidence interval. Models also controlled other covariates, such as age, gender, residence, migration status, marital status, education, employment status, health insurance status, individual monthly income, chronic disease condition and self-reported health condition. a Multilevel mixed-effects negative binomial regression; b Multilevel mixed-effects logistic regression.

** *p*-value < 0.01, ** *p*-value < 0.05.

**Table S3.** The associations of family physician contract service with native and migrant residents' healthcare utilization

| Variables | Number of monthly primary care visits a | Number of annual hospital admissions a | Number of annual referrals a | Probability of choosing primary health care institutions after illnesses b |
| --- | --- | --- | --- | --- |
| IRR (95% CI) | IRR (95% CI) | IRR (95% CI) | OR (95% CI) |
| **Native residents** |  |  |  |  |
| Contracted with a family physician (vs. did not contracted) | 1.80**(1.22, 2.67) | 0.83 (0.58, 1.17) | 2.02*(1.06, 3.85) | 4.17***(1.96, 8.90) |
| **Migrant residents** |  |  |  |  |
| Contracted with a family physician (vs. did not contracted) | 1.37 (0.20, 9.26) | 0.19 (0.31, 1.17) | -c | -c |

*Note:* UEBMI, Urban Employee Basic Medical Insurance; URRBMI, Urban and Rural Resident Basic Medical Insurance; CNY, Chinese Yuan; IRR, incidence-rate ratio; OR, odds ratio; 95% CI: 95% confidence interval. Models also controlled other covariates, such as age, gender, residence, marital status, education, employment status, health insurance status, individual monthly income, chronic disease condition and self-reported health condition. a Negative binomial regression; b Logistic regression; c Valid parameters cannot be obtained.

*** *p*-value < 0.01, ** *p*-value < 0.05.

**Table S4.** The Logit model of propensity score matching between contracted and non-contracted residents

| Contract | Coef. | SE | *P* value | 95% CI |
| --- | --- | --- | --- | --- |
| Age | 0.03 | 0.01 | <0.01 | (0.02, 0.05) |
| Male (vs. female) | -0.07 | 0.14 | 0.63 | (-0.34, 0.21) |
| Non-migrants (vs. migrants) | 1.78 | 0.22 | <0.01 | (1.34, 2.22) |
| Living in urban areas (vs. rural) | 0.75 | 0.20 | <0.01 | (0.36, 1.14) |
| Married (vs. unmarried) | 0.33 | 0.18 | 0.06 | (-0.02, 0.67) |
| Education (vs. primary school and below) | |  |  |  |
| Middle school | 0.11 | 0.21 | 0.60 | (-0.30, 0.51) |
| High school | 0.08 | 0.22 | 0.72 | (-0.36, 0.52) |
| Two-/Three-Year College/Associate degree | -0.07 | 0.27 | 0.80 | (-0.61, 0.47) |
| Bachelor degree and above | 0.23 | 0.29 | 0.43 | (-0.34, 0.81) |
| Health insurance (vs. UEBMI) | |  |  |  |
| URRBMI | -0.21 | 0.17 | 0.22 | (-0.54, 0.13) |
| Government medical insurance (gong-fei) | 0.38 | 0.25 | 0.13 | (-0.11, 0.87) |
| Having commercial insurance (vs. no) | 0.06 | 0.16 | 0.69 | (-0.25, 0.38) |
| Employment status (vs. Employed) | |  |  |  |
| Retired | -0.26 | 0.23 | 0.26 | (-0.72, 0.20) |
| Unemployed or at school | -0.09 | 0.27 | 0.75 | (-0.62, 0.45) |
| Individual monthly income, CNY (vs. <=3000) | |  |  |  |
| 3000-5000 | -0.40 | 0.19 | 0.04 | (-0.78, -0.02) |
| 5000-8000 | -0.58 | 0.25 | 0.02 | (-1.06, -0.09) |
| >8000 | -0.92 | 0.33 | 0.01 | (-1.57, -0.27) |
| Having chronic disease (vs. no) | 0.70 | 0.15 | <0.01 | (0.40, 0.99) |
| Self-reported health status (control group = good or very good) | | | |  |
| Fair | 0.08 | 0.14 | 0.55 | (-0.19, 0.36) |
| Poor or very poor | 0.13 | 0.20 | 0.53 | (-0.27, 0.52) |
| Constant term | -3.96 | 0.47 | <0.01 | (-4.88, -3.04) |

*Note:* UEBMI, Urban Employee Basic Medical Insurance; URRBMI, Urban and Rural Resident Basic Medical Insurance; CNY, Chinese Yuan; SE: standard error; 95% CI: 95% confidence interval.


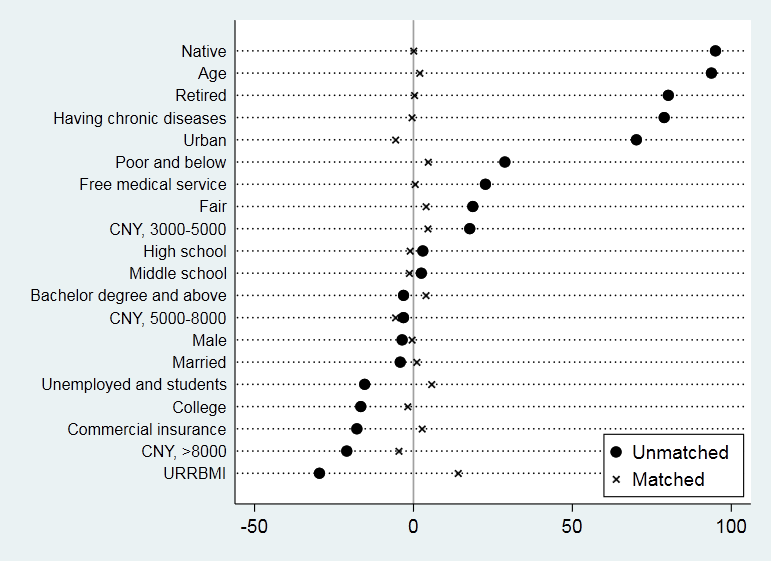
Figure S1. Standardized % bias across covariates before and after matching


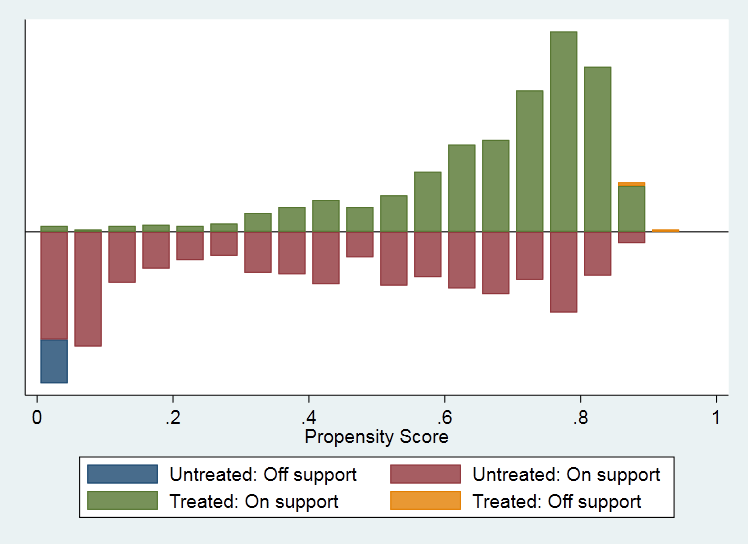
Figure S2. The common support of propensity score by one-to-one matching
